# Supplementary material
Source: publisher figshare collection journal article supplement (https://springernature.figshare.com/ndownloader/files/15606683)
Supplement: Supplementary file [file 15606683]

## ADDITIONAL FILE 4

### Concession Audit

Facility ID: \_\_\_\_\_

Date: \_\_\_\_/\_\_\_\_/\_\_\_\_  
mmm / dd / yyyy

Rater ID: \_\_\_\_\_  
(initials)

Number of concessions: \_\_\_\_\_

|                    |
|--------------------|
| _____ checked by   |
| _____ entered by   |
| _____ date entered |

| Concession Description | Publically operated and/or funded | Privately operated by contractor | Voluntarily operated     |
|------------------------|-----------------------------------|----------------------------------|--------------------------|
|                        | <input type="checkbox"/>          | <input type="checkbox"/>         | <input type="checkbox"/> |
|                        | <input type="checkbox"/>          | <input type="checkbox"/>         | <input type="checkbox"/> |
|                        | <input type="checkbox"/>          | <input type="checkbox"/>         | <input type="checkbox"/> |

Concession being audited: (describe): \_\_\_\_\_

Type of food outlet: \_\_\_\_\_  
(concession or snack bar/café or cafeteria or restaurant)

*Concession/ snack bar café has no dedicated seating area. A cafeteria or restaurant has dedicated seating)*

**A.** Hours of operation:

|                  | Monday | Tuesday | Wednesday | Thursday | Friday | Saturday | Sunday |
|------------------|--------|---------|-----------|----------|--------|----------|--------|
| Facility hours:  |        |         |           |          |        |          |        |
| Concession hours |        |         |           |          |        |          |        |

### **COOKING STYLES** (You may need to ask):

- |                                               |    |     |
|-----------------------------------------------|----|-----|
| a) Does the concession have a deep-fat fryer? | No | Yes |
| b) Does the concession have a griddle?        | No | Yes |
| c) Does the concession have a grill?          | No | Yes |
| d) Does the concession have an oven?          | No | Yes |

### **MENU REVIEW** (You may need to ask questions 1 – 12)

**\* Please take photos of all menus. Make sure you can read the menu in the photo! \***

- |                                                    |    |     |
|----------------------------------------------------|----|-----|
| 1. Is 1% low-fat, skim, or non-fat milk available? | No | Yes |
|----------------------------------------------------|----|-----|

2. Is 100% fruit juice available? No Yes
3. Is 100% wheat or whole grain bread available? No Yes
4. Is white or sourdough bread available? No Yes
5. Are 'regular' (deep-fat fried) French fries available? No Yes
6. Are baked French fries available? No Yes
7. Are regular (fried) potato/taco etc. chips available? No Yes
8. Are baked chips available ( $\leq 3$  grams fat/serving)? No Yes
9. Is fruit (w/out added sugar) available? No Yes

# of choices? \_\_\_\_\_

10. Are non-fried vegetables without added sauce available? No Yes

# of choices? \_\_\_\_\_

11. Are high fat side-dishes (e.g. snacks, non-entrée, non-packaged foods, purchased separately) available? No Yes

# of choices? \_\_\_\_\_

12. Is low fat or fat-free salad dressing available? No Yes

**MAIN DISH/ENTREES and MAIN DISH SALADS** (Use primarily menu review)

13. List all **main dishes** (must have significant protein source and at least one other food group. It should be considered a meal. See NEMS rules.)

|         | 1             | 2                 | 3                   | 4               |                              |
|---------|---------------|-------------------|---------------------|-----------------|------------------------------|
| Entrées | Whole grain?* | Quality protein?* | Vegetable serving?* | Added fat? **** | Entrée score (1 + 2 + 3 – 4) |
|         |               |                   |                     |                 |                              |
|         |               |                   |                     |                 |                              |
|         |               |                   |                     |                 |                              |
|         |               |                   |                     |                 |                              |
|         |               |                   |                     |                 |                              |
|         |               |                   |                     |                 |                              |
|         |               |                   |                     |                 |                              |
|         |               |                   |                     |                 |                              |
|         |               |                   |                     |                 |                              |
|         |               |                   |                     |                 |                              |
|         |               |                   |                     |                 |                              |



Total # CT in columns 1,2 and 3 = \_\_\_\_\_

14. a) Total number of main dishes/ entrees: \_\_\_\_\_

b) # of main dish/entrees with vegetable sides? \_\_\_\_\_

c) # of main dish/entrees with fried sides? \_\_\_\_\_

d) # of main dish/entrees with NO sides? \_\_\_\_\_

15. a) Are healthy options available for main dishes and entrees? No Yes

b) # of choices? \_\_\_\_\_ (score = 3 from previous page)

16. a) Total number of main dish salads? \_\_\_\_\_

b) # of healthy main dish salad choices? \_\_\_\_\_

17. Are healthy entrees identified on menu? No Yes

18. All-you-can-eat or "unlimited trips"? No Yes

19. Menu notations that encourage large portion sizes.  
(e.g Super-size items on the menu) No Yes

|                                                                                                                    |              |              |
|--------------------------------------------------------------------------------------------------------------------|--------------|--------------|
| 20. Menu notations that discourage special requests.<br>(e.g. <i>No substitutions</i> or charge for substitutions) | No           | Yes          |
| 21. Kid's menu?<br>If no kid's menu, skip to question 22                                                           | No           | Yes          |
| a. Age limit                                                                                                       | O 10 & Under | O 12 & Under |
|                                                                                                                    | O Other      | O NA         |
| b. Any healthy entrees?                                                                                            | No           | Yes          |
| c. 100% fruit juice                                                                                                | No           | Yes          |
| d. 1% low-fat, skim or non-fat milk                                                                                | No           | Yes          |
| e. Are there any free refills on unhealthy drinks?                                                                 | No           | Yes          |
| f. Are there any healthy side items (either assigned or to choose)?                                                | No           | Yes          |
| g. Can you substitute a healthy side for an assigned unhealthy one?                                                | No           | Yes          |
| h. Do any entrees that have assigned sides include an assigned healthy side?                                       | No           | Yes          |
| i. Is an unhealthy dessert automatically included in a kid's meal?                                                 | No           | Yes          |
| j. Are there any healthy desserts(either free or at additional cost)?                                              | No           | Yes          |
| k. Is nutrition information (e.g. calories or fat) provided on the kid's menu?                                     | No           | Yes          |
| l. Other unhealthful eating promotion on the kids menu?                                                            | No           | Yes          |
| m. Other healthful eating promotion on the kids menu?                                                              | No           | Yes          |

### **SIGNAGE AND PROMOTIONS**

|                                                                                                                                                                    |    |     |    |
|--------------------------------------------------------------------------------------------------------------------------------------------------------------------|----|-----|----|
| 22. Is nutrition information posted near point-of-purchase, or available in a brochure?                                                                            | No | Yes |    |
| 23. Do signs/table tents/displays <u>encourage healthy</u> eating?                                                                                                 | No | Yes | NA |
| 24. Do signs/table tents/displays encourage overeating?<br>(all-you-can-eat, super-size, jumbo, grande, supreme, king, size feast descriptors on menu or signage)? | No | Yes | NA |

### **NUTRITION INFORMATION**

|                                                                    |    |     |    |
|--------------------------------------------------------------------|----|-----|----|
| 25. Is nutrition information available on site?                    | No | Yes |    |
| 26. Is nutrition information on the in-concession menu?            | No | Yes |    |
| 27. Is there nutrition information on the take-away menu?          | No | Yes | NA |
| 28. Are healthier menu items identified on the take-away menu?     | No | Yes | NA |
| 29. Is nutrition information available on the facility website?    | No | Yes | NA |
| 30. Does the facility internet site identify healthier menu items? | No | Yes | NA |

31. Is there a venue within the facility that sells alcohol?

No    Yes

## CONCESSION - PACKAGED FOOD AND BEVERAGE AUDIT

Purpose: to audit the packaged foods and beverages available in the concession. Include foods and beverages that would normally be found in a vending machine. Also include fountain drinks and their sizes.

**Step 1:** Record if the product is at the **Point of Purchase (POP)**. POP products are within arm's reach of the cash register and/or directly in your sight line behind the register. (e.g. in a smaller concession there is often limited counter space so products are placed behind the till so customer can see them). Next, record the product details - company name, product's name, flavour, size and price.

**Step 2:** Find the item in the Product Binder and record y/n. If it is not in the binder, take a good photo of the nutrition label.

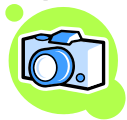

**Step 3:** Rate the concession packaged products using the Brand Name Food List.

Please **include a photo or two** of the areas where packaged foods/beverages are found in the concession.

| Product # | POP?<br>(y/n) | Company Name<br>(e.g. Pepsi, Lays, Doritos etc) | Product Name & Flavour<br>(e.g. Gatorade-Berry Blast, Doritos Chips-Salsa, Mars Bar) | Size<br>(ml or g) | Price<br>(\$) | In Product Binder?<br>(y/n) |
|-----------|---------------|-------------------------------------------------|--------------------------------------------------------------------------------------|-------------------|---------------|-----------------------------|
| 1         |               |                                                 |                                                                                      |                   |               |                             |
| 2         |               |                                                 |                                                                                      |                   |               |                             |
| 3         |               |                                                 |                                                                                      |                   |               |                             |
| 4         |               |                                                 |                                                                                      |                   |               |                             |
| 5         |               |                                                 |                                                                                      |                   |               |                             |
| 6         |               |                                                 |                                                                                      |                   |               |                             |
| 7         |               |                                                 |                                                                                      |                   |               |                             |
| 8         |               |                                                 |                                                                                      |                   |               |                             |

| <b>Product #</b> | <b>POP?<br/>(y/n)</b> | <b>Company Name</b><br>(e.g. Pepsi, Lays, Doritos etc) | <b>Product Name &amp; Flavour</b><br>(e.g. Gatorade-Berry Blast, Doritos Chips-Salsa, Mars Bar) | <b>Size</b><br>(ml or g) | <b>Price</b><br>(\$) | <b>In Product Binder?</b><br>(y/n) |
|------------------|-----------------------|--------------------------------------------------------|-------------------------------------------------------------------------------------------------|--------------------------|----------------------|------------------------------------|
| 9                |                       |                                                        |                                                                                                 |                          |                      |                                    |
| 10               |                       |                                                        |                                                                                                 |                          |                      |                                    |
| 11               |                       |                                                        |                                                                                                 |                          |                      |                                    |
| 12               |                       |                                                        |                                                                                                 |                          |                      |                                    |
| 13               |                       |                                                        |                                                                                                 |                          |                      |                                    |
| 14               |                       |                                                        |                                                                                                 |                          |                      |                                    |
| 15               |                       |                                                        |                                                                                                 |                          |                      |                                    |
| 16               |                       |                                                        |                                                                                                 |                          |                      |                                    |
| 17               |                       |                                                        |                                                                                                 |                          |                      |                                    |
| 18               |                       |                                                        |                                                                                                 |                          |                      |                                    |
| 19               |                       |                                                        |                                                                                                 |                          |                      |                                    |
| 20               |                       |                                                        |                                                                                                 |                          |                      |                                    |
| 21               |                       |                                                        |                                                                                                 |                          |                      |                                    |
| 22               |                       |                                                        |                                                                                                 |                          |                      |                                    |



| <b>Product #</b> | <b>POP?<br/>(y/n)</b> | <b>Company Name<br/>(e.g. Pepsi, Lays, Doritos etc)</b> | <b>Product Name &amp; Flavour<br/>(e.g. Gatorade-Berry Blast, Doritos Chips-Salsa, Mars Bar)</b> | <b>Size<br/>(ml or g)</b> | <b>Price<br/>(\$)</b> | <b>In Product Binder?<br/>(y/n)</b> |
|------------------|-----------------------|---------------------------------------------------------|--------------------------------------------------------------------------------------------------|---------------------------|-----------------------|-------------------------------------|
| 23               |                       |                                                         |                                                                                                  |                           |                       |                                     |
| 24               |                       |                                                         |                                                                                                  |                           |                       |                                     |
| 25               |                       |                                                         |                                                                                                  |                           |                       |                                     |
| 26               |                       |                                                         |                                                                                                  |                           |                       |                                     |
| 27               |                       |                                                         |                                                                                                  |                           |                       |                                     |
| 28               |                       |                                                         |                                                                                                  |                           |                       |                                     |
| 29               |                       |                                                         |                                                                                                  |                           |                       |                                     |
| 30               |                       |                                                         |                                                                                                  |                           |                       |                                     |
| 31               |                       |                                                         |                                                                                                  |                           |                       |                                     |
| 32               |                       |                                                         |                                                                                                  |                           |                       |                                     |
| 33               |                       |                                                         |                                                                                                  |                           |                       |                                     |
| 34               |                       |                                                         |                                                                                                  |                           |                       |                                     |
| 35               |                       |                                                         |                                                                                                  |                           |                       |                                     |
| 36               |                       |                                                         |                                                                                                  |                           |                       |                                     |
